# Supplementary material
Source: PubMed Central journal article supplement (PMC7400019)
Supplement: Supplementary_Data.pdf [file Supplementary_Data.pdf]

Table SI. Doses employed per drug.

| Drug           | Dose          |
|----------------|---------------|
| Orlistat       | 8.7 $\mu$ M   |
| Lonidamine     | 75.86 $\mu$ M |
| DON            | 6.12 $\mu$ M  |
| Growth hormone | 0.87 nM       |
| Insulin        | 0.809 nM      |
| Indomethacin   | 7.5 $\mu$ M   |

DON, 6-diazo-5-oxo-L-norleucine.

Table SII. Inhibitors for dependency and capacity tests.

| Fuel test             | 1° inhibitor    | 2° inhibitor    |
|-----------------------|-----------------|-----------------|
| Glucose dependency    | UK5099          | BPTES+Etomoxir  |
| Glutamine dependency  | BPTES           | UK5099+Etomoxir |
| Fatty acid dependency | Etomoxir        | UK5099+BPTES    |
| Glucose capacity      | BPTES+Etomoxir  | UK5099          |
| Glutamine capacity    | UK5099+Etomoxir | BPTES           |
| Fatty acid capacity   | UK5099+BPTES    | Etomoxir        |
